# Supplementary material for: Poly (aryl sulfone)s containing 5,11-dihydroindolo[3,2-b] carbazole moieties in the main chain: non-conjugated blue-light-emitting materials
Source: Royal Society of Chemistry journal article supplement (doi:10.1039/d3py00218g), 2023-01-01
Supplement: d3py00218g1.pdf [file d3py00218g1.pdf]

# Poly (aryl sulfone)s Containing 5,11-Dihydroindolo[3,2-b]carbazole Moieties in Main Chain: A Non-conjugated Blue Light- emitting Materials

Yumiao Su,<sup>a, b</sup> Wenmu Li<sup>\*, a</sup>

*a. Key Laboratory of Optoelectronic Materials Chemistry and Physics, Fujian  
Institute of Research on the Structure of Matter, Chinese Academy of Sciences,  
Fuzhou 350002, China*

*b. University of Chinese Academy of Sciences, Beijing 100049, China*

## Content

**Figure S1.** MS spectrum of monomer **1a**.

**Figure S2.**  $^1\text{H}$  NMR spectrum ( $\text{DMSO-}d_6$ ) of monomer **1a**.

**Figure S3.** MS spectrum of monomer **1c**.

**Figure S4.**  $^1\text{H}$  NMR spectrum ( $\text{CDCl}_3$ ) of monomer **1c**.

**Figure S5.** MS spectrum of monomer **1d**.

**Figure S6.**  $^1\text{H}$  NMR spectrum ( $\text{DMSO-}d_6$ ) of monomer **1d**.

**Figure S7.**  $^1\text{H}$  NMR spectrum ( $\text{CDCl}_3$ ) of polymer **2c**.

**Figure S8.**  $^1\text{H}$  NMR spectrum ( $\text{CDCl}_3$ ) of polymer **2d**.

**Figure S9.** FT-IR spectrum of monomers.

**Figure S10.** FT-IR spectrum of polymers.

**Figure S11.** Cyclic voltammograms of Fc (a) in 0.1 mol/L  $\text{Bu}_4\text{NPF}_6$ ,  $\text{CH}_3\text{CN}$  solution and Fc (b) in 0.1 mol/L  $\text{Bu}_4\text{NPF}_6$ , THF solution.

**Figure S12.** Molecular models of polymer **2c**.

**Figure S13.** Molecular models of polymer **2d**.

**Figure S14.** The HOMO and LUMO of monomers and polymers calculated at the def2-TZVP level.

**Figure S15.** Quantum yield of polymer 2b (a), polymer 2c (b), polymer 2d (c).

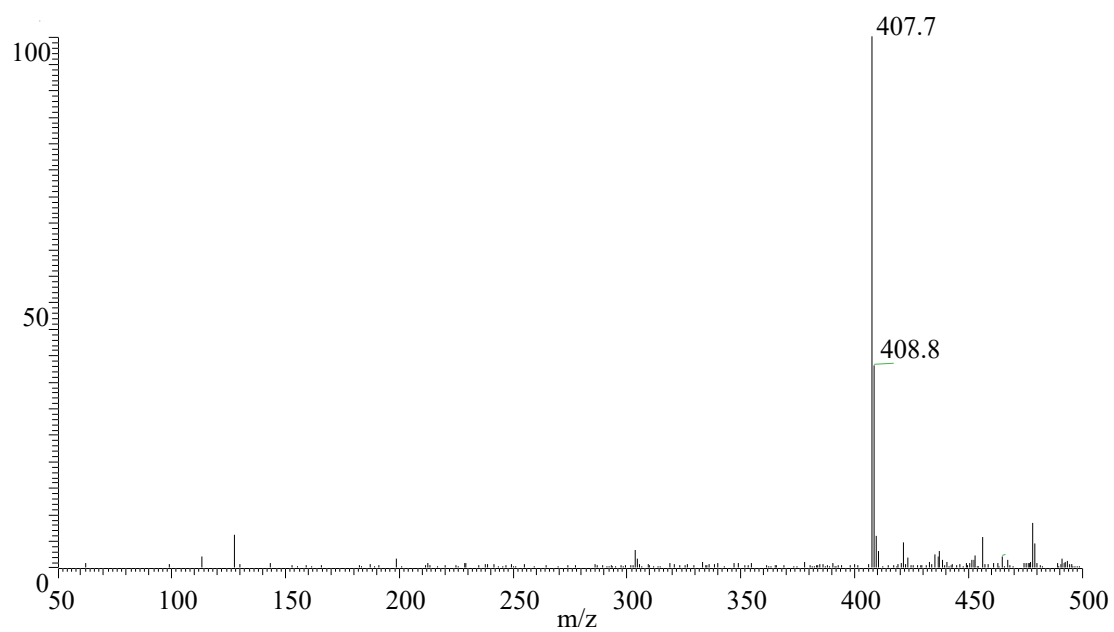

**Figure S1.** MS spectrum of monomer **1a**.

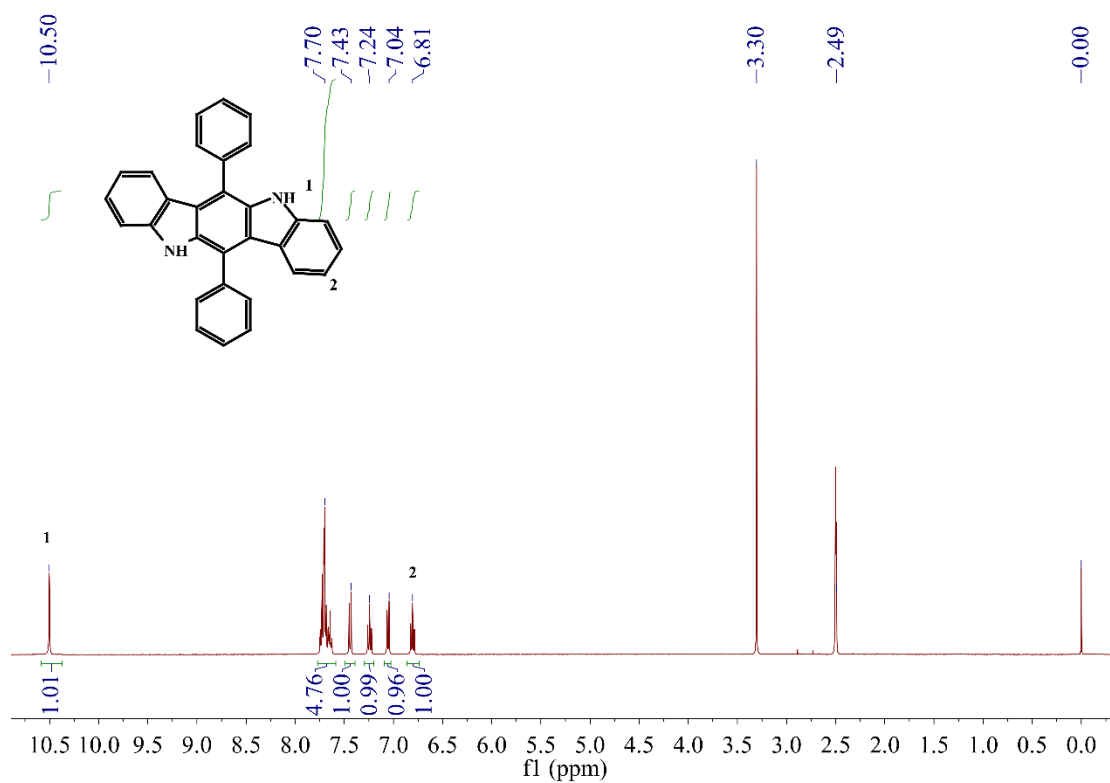

**Figure S2.**  $^1\text{H}$  NMR spectrum ( $\text{DMSO-}d_6$ ) of monomer **1a**.

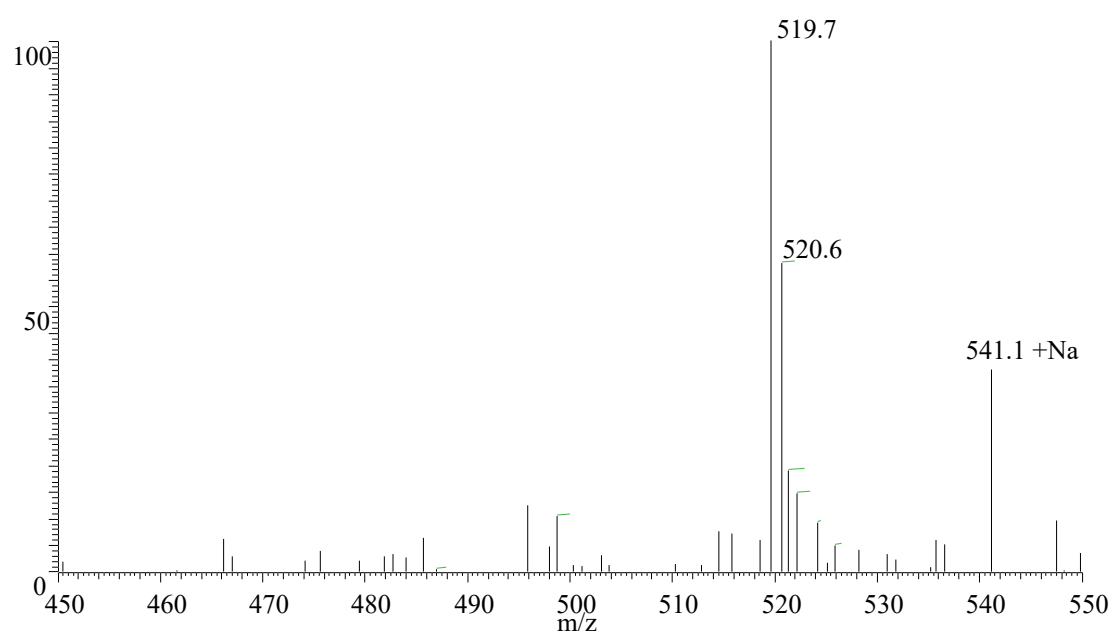

**Figure S3.** MS spectrum of monomer **1c**.

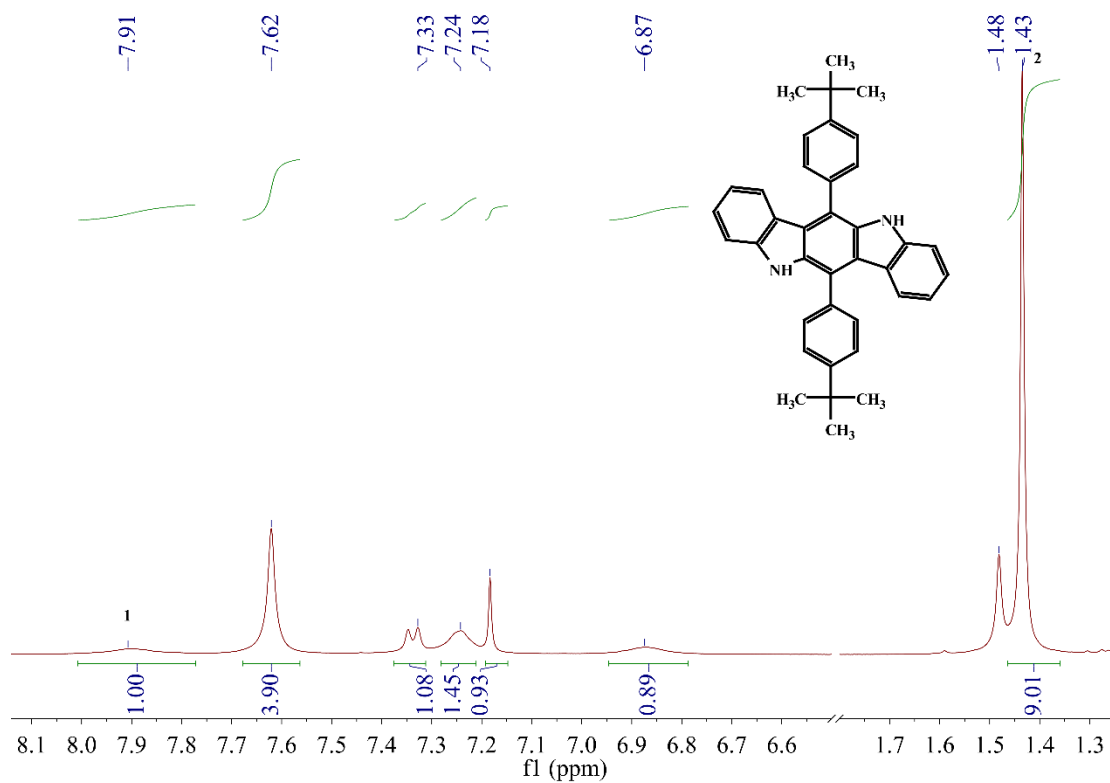

**Figure S4.**  $^1\text{H}$  NMR spectrum ( $\text{CDCl}_3$ ) of monomer **1c**.

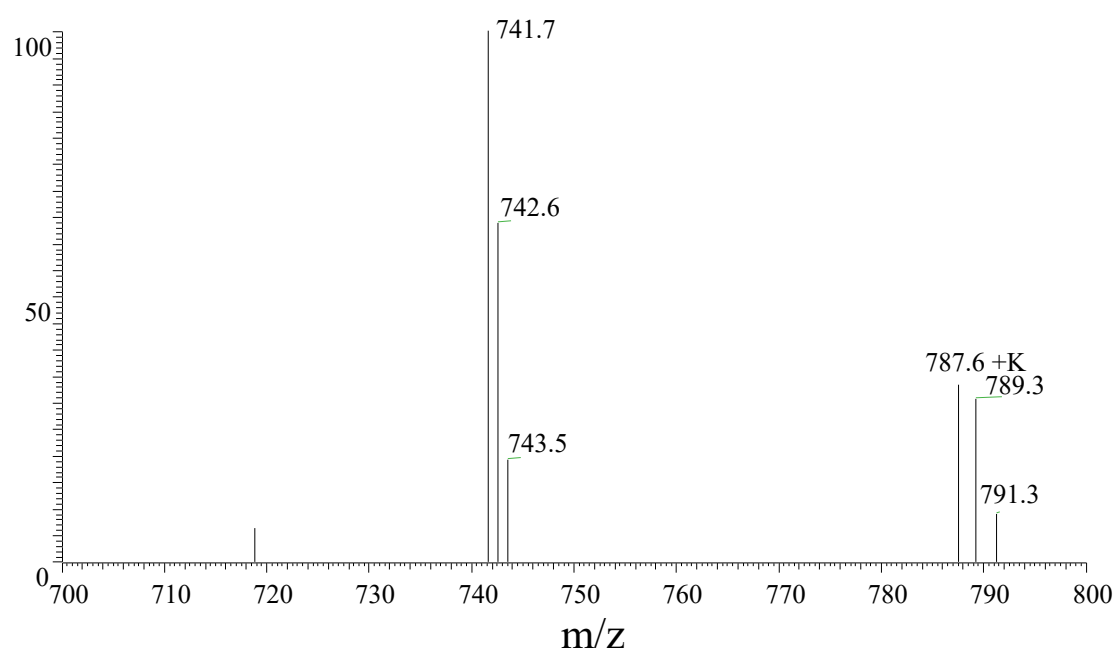

**Figure S5.** MS spectrum of monomer **1d**.

Fcox and Fcred

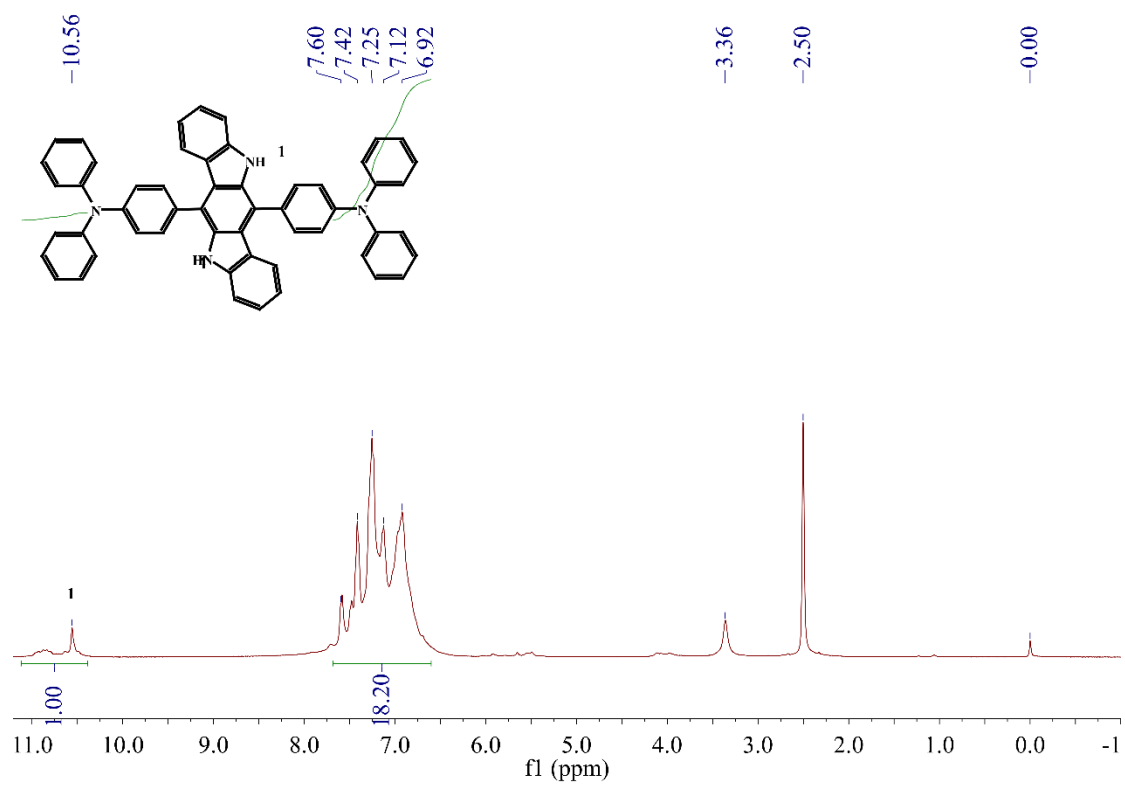

**Figure S6.**  $^1\text{H}$  NMR spectrum (DMSO- $d_6$ ) of monomer **1d**.

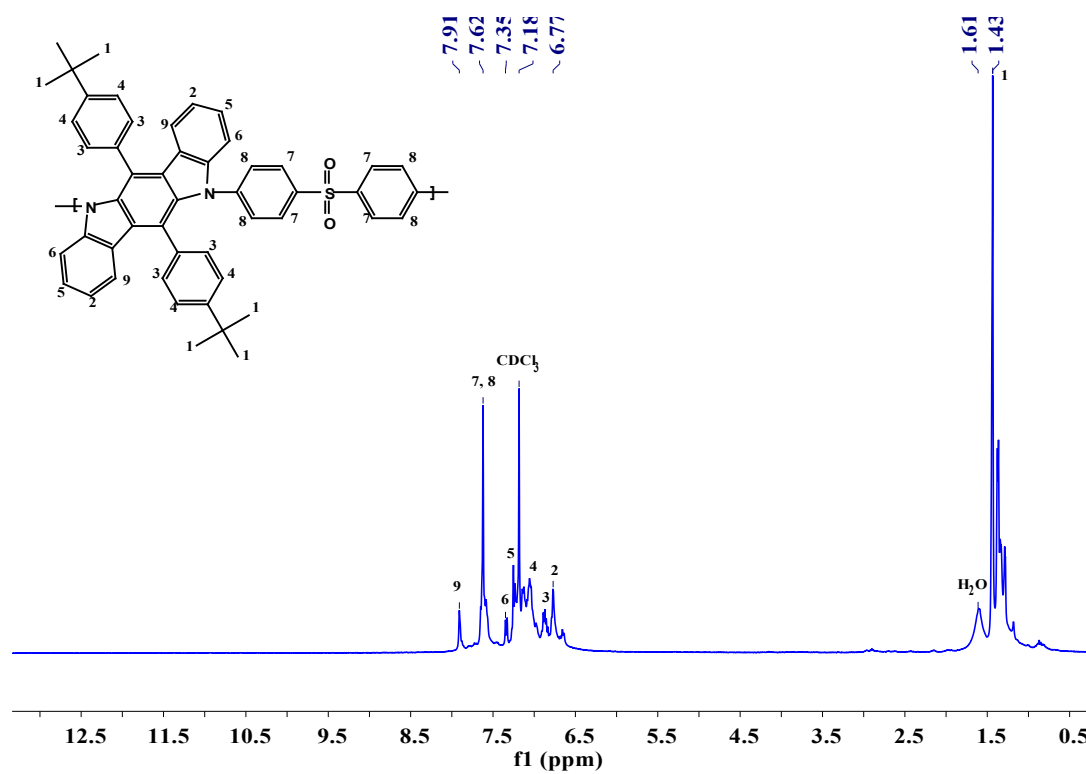

**Figure S7.** <sup>1</sup>H NMR spectrum (CDCl<sub>3</sub>) of polymer **2c**.

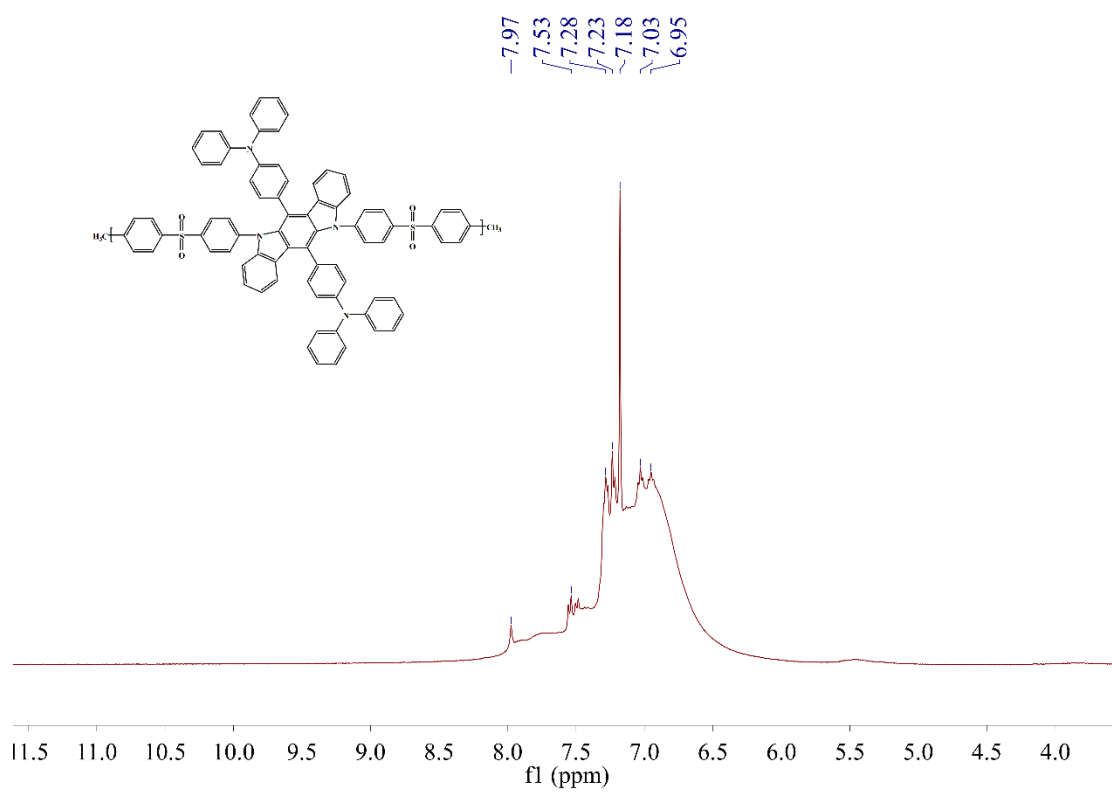

**Figure S8.**  $^1\text{H}$  NMR spectrum (CDCl<sub>3</sub>) of polymer **2d**.

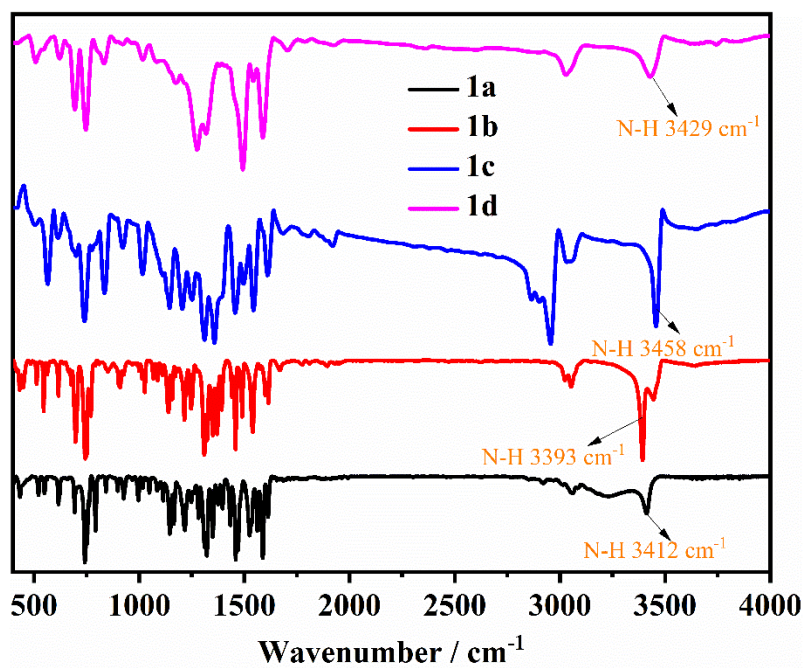

**Figure S9.** FT-IR spectrum of monomers.

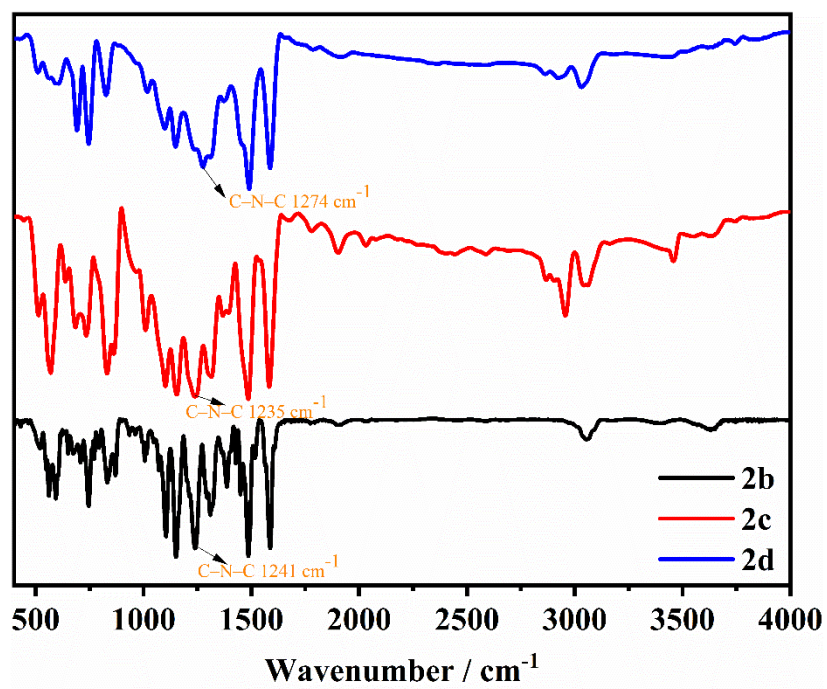

**Figure S10.** FT-IR spectrum of polymers.

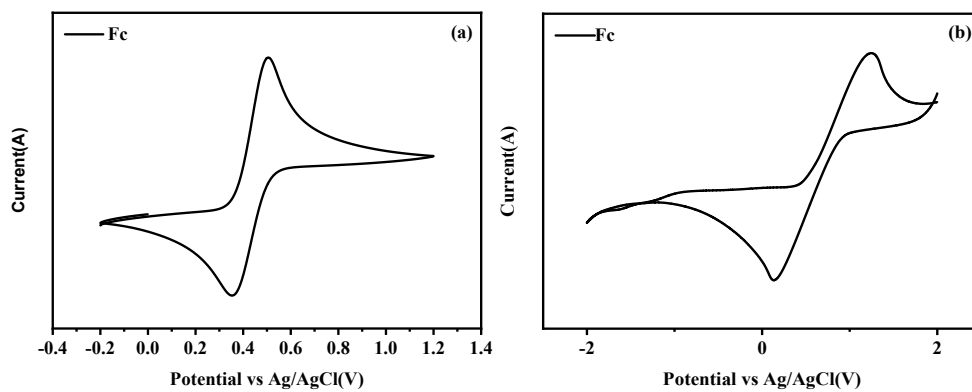

**Figure S11.** Cyclic voltammograms of Fc (a) in 0.1 mol/L  $\text{Bu}_4\text{NPF}_6$ ,  $\text{CH}_3\text{CN}$  solution and Fc (b) in 0.1 mol/L  $\text{Bu}_4\text{NPF}_6$ , THF solution.

$E_{\text{cox}}$  and  $E_{\text{cred}}$  represent the oxidation and reduction potentials of Ferrocene (Fc), which correspond to 0.51V and 0.35V in THF and 1.23V and 0.12V in  $\text{CH}_3\text{CN}$ , respectively.

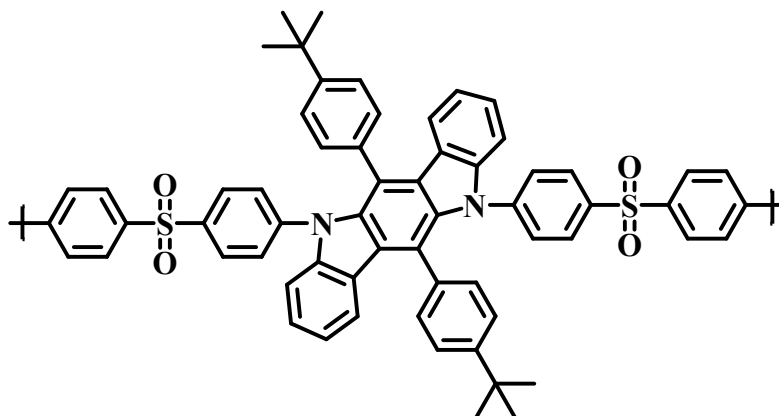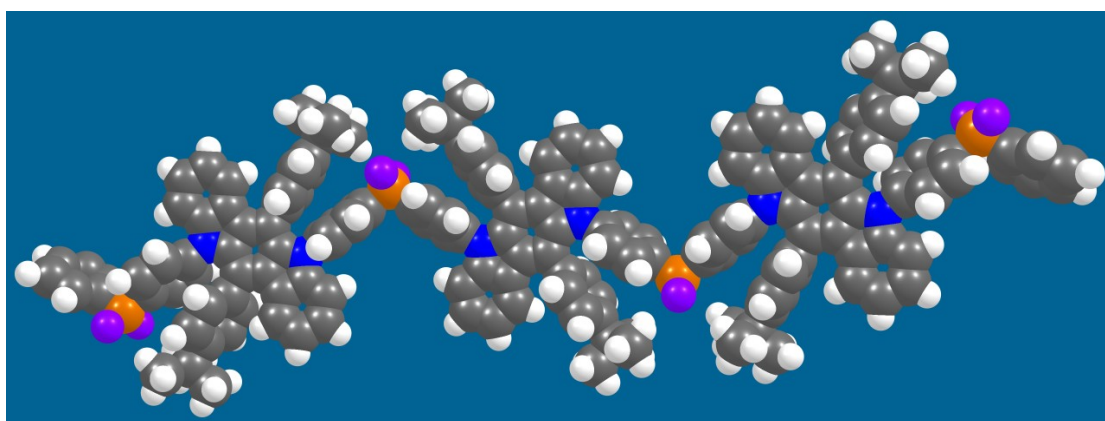

**Figure S12.** Molecular models of polymer **2c**.

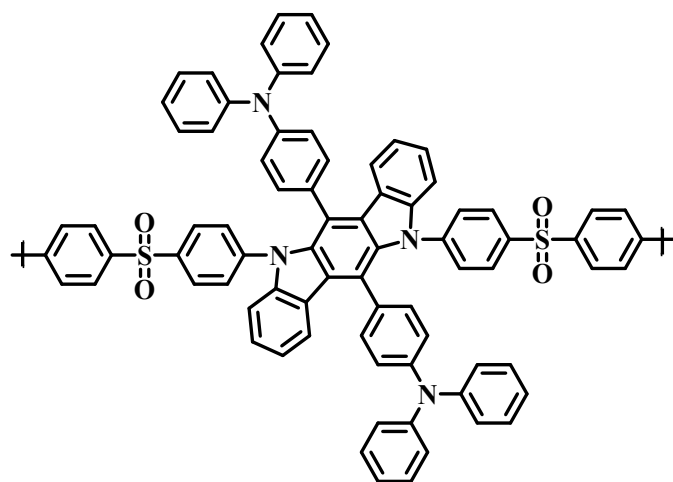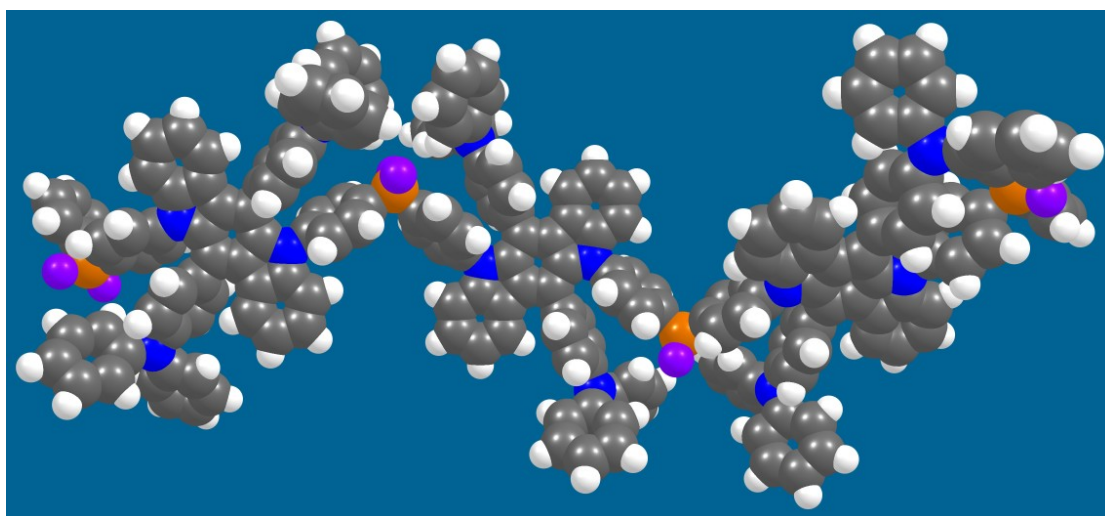

**Figure S13.** Molecular models of polymer **2d**.

| Compound          | HOMO                                                                                | LUMO                                                                                 |
|-------------------|-------------------------------------------------------------------------------------|--------------------------------------------------------------------------------------|
| Monomer <b>1a</b> | 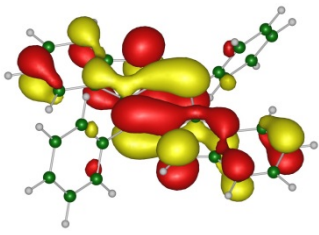   | 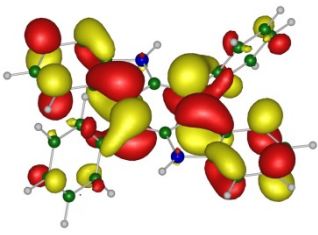   |
| Monomer <b>1c</b> | 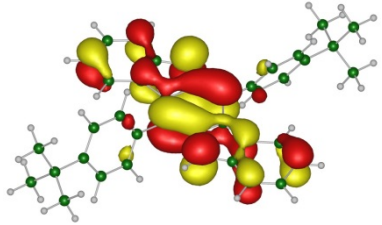   | 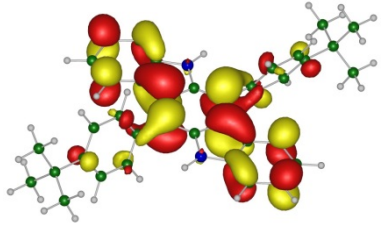   |
| Monomer <b>1d</b> | 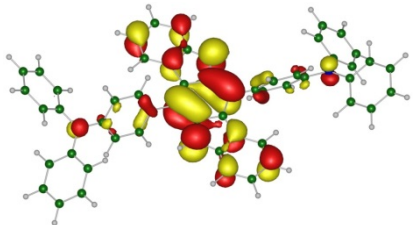   | 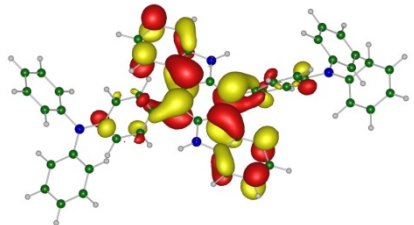   |
| Polymer <b>2c</b> | 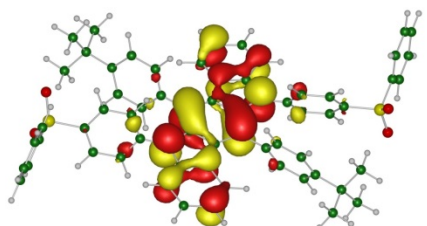 | 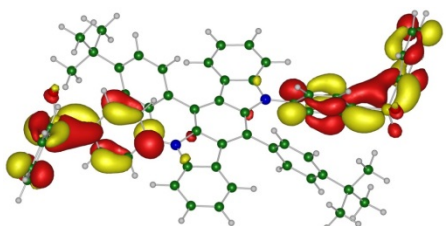 |
| Polymer <b>2d</b> | 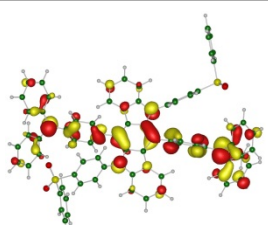 | 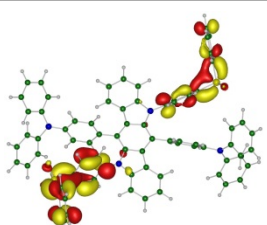 |

**Figure S14.** The HOMO and LUMO of monomers and polymers calculated at the def2-TZVP level.

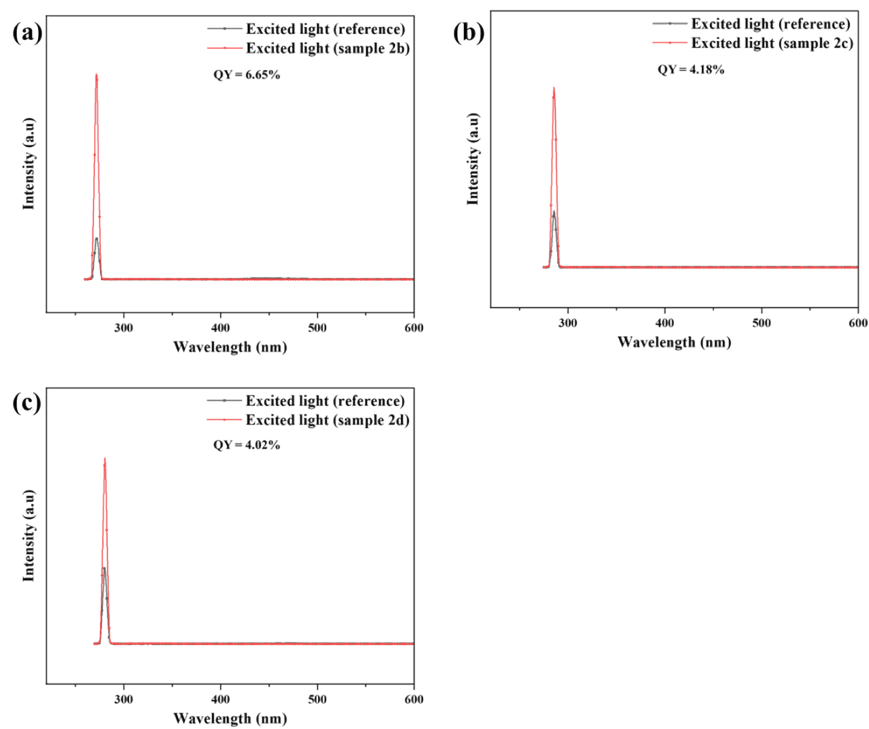

**Figure S15.** Quantum yield of polymer 2b (a), polymer 2c (b), polymer 2d (c).
